1           **Evaluation of host effects on ectomycorrhizal fungal community**  
2                           **compositions in a forest landscape in northern Japan**

3  
4 Shunsuke Matsuoka<sup>1\*</sup>, Yoriko Sugiyama<sup>2</sup>, Ryunosuke Tateno<sup>3</sup>, Shihomi Imamura<sup>4</sup>, Eri  
5 Kawaguchi<sup>5</sup>, Takashi Osono<sup>6</sup>

6  
7 1. Graduate School of Simulation Studies, University of Hyogo 7-1-28 Minatojima-  
8 minamimachi, Chuo-ku, Kobe, 650-0047, Japan

9 2. Graduate school of human and environmental studies, Kyoto University, Kyoto 606-  
10 8501, Japan

11 3. Field Science Education and Research Center, Kyoto University, Kyoto 606-8502,  
12 Japan

13 4. Graduate School of Agriculture, Kyoto University, Kyoto 606-8502, Japan

14 5. Department of Life Science Frontiers, Center for iPS Cell Research and Application,  
15 Kyoto University, Kyoto 606-8507, Japan

16 6. Department of Environmental Systems Science, Faculty of Science and Engineering,  
17 Doshisha University, Kyoto, 610-0394, Japan

18  
19 **\*Author for correspondence:**

20 Shunsuke Matsuoka (code\_matuoka@hotmail.com)

21  
22 **Keywords:** assembly process, ectomycorrhiza, environmental gradient, fungal  
23 community, host preference, spatial structure

24 ***Abstract***

25 Community compositions of ectomycorrhizal (ECM) fungi are similar within the same  
26 host taxa. However, careful interpretation is required to determine whether the  
27 combination of ECM fungi and plants is explained by the host preference of ECM fungi  
28 or by the influence of neighboring conspecific and/or heterospecific hosts. In the present  
29 study, we aimed to evaluate the effects of host species on the ECM community  
30 compositions in a forest landscape (~ 10 km) where monodominant forest stands of six  
31 ECM host species belonging to three families were patchily distributed. The ECM  
32 communities were identified with DNA metabarcoding. A total of 180 ECM operational  
33 taxonomic units (OTUs) were detected. The ECM community compositions were  
34 primarily structured by host species and families, regardless of the soil environments  
35 and spatial arrangements of the sampling plots. In addition, 38 ECM OTUs were  
36 detected from particular host tree species. Furthermore, the neighboring plots harbored  
37 similar fungal compositions, although the host species were different. The relative effect  
38 of the spatial factors on the ECM compositions was weaker than that of host species.  
39 Our results suggest that the host preference of ECM fungi is a primary determinant of  
40 ECM fungal compositions in the forest landscape.

## 41 ***Introduction***

42 Ectomycorrhizal (ECM) fungi are symbionts of tree species belonging to the  
43 families Fagaceae, Betulaceae, and Pinaceae and represent a dominant group of  
44 microorganisms inhabiting temperate and boreal forest floors [1]. ECM fungi play an  
45 essential role in plant growth and nutrient cycling by enhancing nutrient and water  
46 uptake from soil to their host trees [2]. Since the function or ability of ECM fungi varies  
47 from species to species, the community responses of ECM fungi to environmental  
48 changes are, therefore, critical for determining and maintaining forest ecosystem  
49 processes [3]. So far, various factors, such as host taxa [4], soil properties (e.g., pH) [5],  
50 and dispersal limitation [6], have been proposed to affect the compositions of ECM  
51 fungal community. For example, environmentally similar or spatially close sites are  
52 known to harbor similar ECM fungal communities [5–7]. Practically, the ECM fungal  
53 communities in fields are simultaneously affected by these factors. Thus, researchers  
54 now try to separate and quantitatively evaluate the effect of each factor on ECM fungal  
55 communities and have found the significant effects of host on ECM communities [8–  
56 10].

57 Among these factors, the relationships between host tree species and ECM  
58 fungi have been repeatedly tested in variety of regions and/or climatic zones [4, 9–12].  
59 Previous studies have investigated the relatedness of ECM fungal community and host  
60 tree species, mainly in single forest stands (mainly < 1 ha) where several host species  
61 are mixed, by comparing associated ECM fungi among host individuals in different taxa.  
62 These studies have shown that the ECM community compositions are similar within the  
63 same host taxa [7, 12]. Such compositional similarities in ECM fungal communities  
64 among the same host taxa have often been attributed to the preference of ECM fungi or  
65 host for partner species [13, 14].

66 However, previous studies that investigated the effects of host in a single mixed-  
67 forest stand have not necessarily accurately evaluated the host effects owing to some  
68 methodological limitations. First, the individuals of the same host species are likely to  
69 show clustered distribution in response to the local environmental conditions and past  
70 dispersion [15]. In this case, the environmentally similar or spatially close sites tend to  
71 harbor similar host communities (i.e., the host community shows correlation with other

72 factors), making it difficult to separate the effects of host and other factors. Second, in  
73 mixed-forests, ECM fungal communities are inevitably affected by the surrounding host  
74 species. That is, since most fungal spores fall within several meters from sporocarps  
75 [16], the spatially closer trees potentially share more inoculums. Furthermore, the same  
76 ECM fungal individuals can be shared between adjacent trees via belowground mycelia  
77 [17]. Therefore, ECM fungal compositions can be similar among spatially close host  
78 trees, regardless of the host taxa [18]. Thus, in most field studies, the effect of each  
79 factor has not been fully separated and the effect of host has not been accurately  
80 evaluated [8], even though the effects of each factor on ECM fungal communities were  
81 evaluated simultaneously.

82         Among these problems, the correlation between host and other factors and the  
83 effects of surrounding host species can be eliminated by conducting surveys in several  
84 patchily distributed monodominant forest stands. If the host species has a strong  
85 influence, the ECM composition would cluster by host species, regardless of the spatial  
86 arrangements of the forest stands. On the other hand, if other environmental factors or  
87 spatial distance have stronger effects than the host species, the ECM fungal community  
88 compositions should resemble among environmentally similar or spatially closer sites,  
89 regardless of the host species.

90         In the present study, we aimed to evaluate the effect of host trees on ECM  
91 fungal community compositions relative to the soil environments and spatial distance at  
92 a forest landscape (~ 10 km). Study forests include monodominant forest stands of six  
93 ECM host species, including three broad-leaved tree species belonging to the families  
94 Fagaceae and Betulaceae and three coniferous species belonging to the family Pinaceae.  
95 These forest stands are patchily distributed over a forest. In this setting, we analyzed (1)  
96 the effects of the host tree species belonging to three families on the community  
97 compositions of ECM fungi, (2) the explanatory power of host tree identities on the  
98 ECM compositions relative to other environmental and spatial variables, and (3) the  
99 relationships between individual ECM fungal species and host tree species.

100  
101  
102

## 103 **Materials and Methods**

### 104 Study sites and Sampling procedure

105 The study was conducted in the Shibecha branch of Hokkaido Forest Research  
106 Station, Field Science Education and Research Center, Kyoto University in the eastern  
107 part of Hokkaido Island in northern Japan (1446.8 ha, 43° 22' N, 144° 37' E,  
108 approximately 25–150 m a.s.l.). The forest area of the station extends approximately 9  
109 km from south to north and approximately 1–3 km from east to west and is surrounded  
110 by a pasture. The 30-year mean annual temperature is 6.2 °C, and the 30-year mean  
111 annual precipitation of the forest is 1169.7 mm (1981–2010, 43° 19' N, 144° 36' E,  
112 Kyoto University Forests 2012).

113 The vegetation of old-growth natural forest is mainly composed of deciduous  
114 broad-leaved tree species such as *Quercus crispula* Blume, *Ulmus davidiana* Planchon  
115 var. *japonica* (Rehder) Nakai, *Fraxinus mandschurica* Rupr. var. *japonica* Maxim., and  
116 *Acer pictum* Thunb. subsp. *dissectum* (Wesm.) H. Ohashi. Pioneer species, such as  
117 *Betula platyphylla* Sukaczew and *Alnus hirsuta* (Spach) Turcz. ex Rupr., are patchily  
118 distributed on clear-cut areas such as road side and timber yard. The coniferous  
119 plantations are monoculture and coniferous species, such as *Larix kaempferi* (Lamb.)  
120 Carr., *Abies sachalinensis* F. Schmidt, and *Picea glehnii* F. Schmidt, have been planted  
121 from the 1960s to the 1980s in this forest station. *Abies sachalinensis* and *P. glehnii* are  
122 common species in the Hokkaido Island, but are not naturally distributed in the forest  
123 station. *Larix kaempferi* does not occur naturally on Hokkaido Island, but was  
124 introduced from Honshu Island in Japan for afforestation. Approximately 70% of the  
125 total area of the forest station is covered by deciduous broad-leaved forests, and the  
126 remaining area is occupied by plantation forests in which tree species *L. kaempferi*, *A.*  
127 *sachalinensis*, and *P. glehnii* cover approximately 14%, 8%, and 2%, respectively.

128 Six tree species (three broad-leaved and three coniferous species) were targeted  
129 as host species. For each host species, three stands (approximately 0.4 ha) where the  
130 targeted species dominated as an ECM host species, were chosen as sampling plots  
131 (Table 1 and Fig. 1). The latitude, longitude, altitude of each plot and the diameter at  
132 breast height (DBH) of individual tree species were recorded. At each plot, we selected  
133 10 host species individuals that had the DBH > 20 cm, and collected a block of surface

134 soil (10 cm × 10 cm × 5 cm from a depth of 5–10 cm), including tree roots within 1 m  
135 from each tree trunk. All host tree individuals were spaced at least 3 m apart from each  
136 other, thus minimizing the spatial autocorrelation effect of individual ECM fungi [19,  
137 20]. The blocks were kept in plastic bags and frozen at –20°C during the transport to the  
138 laboratory. A total of 180 blocks (6 host species × 3 study plots × 10 soil blocks) were  
139 used for the study.

140 In the laboratory, fine roots of trees were extracted from the soil samples using  
141 a 2-mm mesh sieve and gently washed with tap water to remove the soil particles and  
142 debris. In each block, 20 individual root segments (approximately 5 cm in length) were  
143 selected, and one root tip (1 to 2 mm in length) was collected from each root segment  
144 under a 20X binocular microscope. The 20 root tips resulting from each block were  
145 pooled and kept in a tube containing 70% ethanol (w/v) at –20°C. Before extracting  
146 DNA, the root tips were washed to remove the small particles on the root surface by  
147 0.005% aerosol OT (di-2-ethylhexyl sodium sulfosuccinate) solution (w/v) and rinsed  
148 with sterile distilled water. The root tips were then transferred to the tubes containing  
149 cetyltrimethylammonium bromide (CTAB) lysis buffer and stored at –20°C until DNA  
150 extraction.

151

#### 152 Soil properties

153 Mineral soils (0–10 cm in depth) were collected by a soil core sampler (surface  
154 area was 20 cm<sup>2</sup>). Five soil core samples were collected at the distance interval of 1.5 m  
155 along a straight line from each plot and composited for each plot. The composited soil  
156 samples were dried at 70°C for more than 72 hours and sieved through a 4-mm mesh  
157 sieve to remove fine roots, pieces of organic matters, and gravels. Total soil N and C  
158 were determined by an NC analyzer (Sumigraph NC-900, Sumika Chemical Analysis  
159 Service, Ltd., Osaka, Japan), and the soil pH was determined by a pH meter (HORIBA  
160 D-51, Horiba, Ltd., Kyoto, Japan) after extraction with deionized water at a dry  
161 soil:water ratio of 2:5 (weight/weight).

162

#### 163 DNA extraction, PCR amplification, and pyrosequencing

164 DNA analysis was generally performed according to methods described by  
165 Matsuoka *et al.* [8]. Whole DNA was extracted from root tips in 180 samples using the

166 modified CTAB method described by Gardes and Bruns [21]. For the direct 454  
167 pyrosequencing of the fungal internal transcribed spacer 1 (ITS1) [22], we used a semi-  
168 nested PCR protocol. First, the entire ITS region and the 5'-end region of the large  
169 subunit were amplified using the fungus-specific primers ITS1F [21] and LR3 [23].  
170 PCR was performed in a 20- $\mu$ L volume containing 1.6  $\mu$ L of template DNA, 0.3  $\mu$ L of  
171 KOD FX NEO (TOYOBO, Osaka, Japan), 9.0  $\mu$ L of 2X buffer, 4.0  $\mu$ L of dNTPs, 0.5  
172  $\mu$ L each of the two primers (10  $\mu$ M), and 4.1  $\mu$ L of distilled water. The PCR  
173 amplification was performed using the following conditions: an initial denaturation step  
174 at 94°C for 5 min, followed by 23 cycles of denaturation at 95°C for 30 s, annealing at  
175 58°C for 30 s, and extension at 72°C for 90 s and then a final extension step at 72°C for  
176 10 min. The PCR products were purified using the ExoSAP-IT PCR Product Clean-up  
177 Kit (GE Healthcare, Little Chalfont, Buckinghamshire, U.K.). Thereafter, the second  
178 PCR targeting the ITS1 region was performed using the ITS1F primer fused with an 8-  
179 bp DNA tag [24] and the universal primer ITS2 [25]. The second PCR was performed  
180 in a 20- $\mu$ L volume containing 1.0  $\mu$ L of template DNA, 0.2  $\mu$ L of KOD Plus NEO  
181 (TOYOBO), 2.0  $\mu$ L of 10X buffer, 2.0  $\mu$ L of dNTPs, 0.8  $\mu$ L each of the two primers (5  
182  $\mu$ M), and 13.2  $\mu$ L of distilled water. The PCR conditions were as follows: an initial  
183 denaturation step at 94°C for 5 min, followed by 28 cycles of denaturation at 95°C for  
184 30 s, annealing at 60°C for 30 s, and extension at 72°C for 90 s and a final extension  
185 step at 72°C for 10 min. The PCR products were pooled into five libraries and purified  
186 using an AMPure Magnetic Bead Kit (Beckman Coulter, California, USA). The pooled  
187 products were sequenced in two 1/8 regions using the GS-FLX sequencer (Roche 454  
188 Titanium) at the Graduate School of Science, Kyoto University, Japan. The sequence  
189 data were deposited in the Sequence Read Archive of the DNA Data Bank of Japan  
190 (accession number: DRA007781).

191

## 192 Bioinformatics

193 The bioinformatics analyses were performed using the methods described by  
194 Matsuoka *et al.* [8]. Using the 454 pyrosequencing method, 272 358 reads were  
195 obtained. These reads were trimmed with sequence quality [26] and sorted into  
196 individual samples using the sample-specific tags. The pyrosequencing reads were  
197 assembled using Claident pipeline v0.2.2018.05.29 (software available online) [27].

198 First, the short reads (< 150 bp) and then the potentially chimeric sequences and  
199 pyrosequencing errors were removed, using the software programs UCHIME [28] and  
200 CD-HIT-OTU [29], respectively. The remaining 204 627 reads were assembled at a  
201 threshold similarity of 97%, which is widely used for the fungal ITS region [30], and  
202 the resulting consensus sequences represented molecular operational taxonomic units  
203 (OTUs). Then singleton OTUs were removed. The consensus sequences of the OTUs  
204 are listed in Table S1 (Supporting Information).

205 To systematically annotate the taxonomy of OTUs, we used Claident  
206 v0.2.2018.05.29 [31], which was built upon an automated basic local alignment search  
207 tool (BLAST) search using the National Center for Biotechnology Information (NCBI)  
208 BLAST+ algorithm [32] and a taxonomy-based sequence identification engine. Using  
209 the reference database from the International Nuceotide Sequence Database  
210 Collaboration (INSDC) for taxonomic assignment, the sequences homologous to the  
211 ITS sequence of each query were fetched, and then the taxonomic assignment was  
212 performed based on the lowest common ancestor algorithm [33]. The results of Claident  
213 and the number of reads for the OTUs identified are given in Table S1. To screen for  
214 the ECM fungi, we referred to the reviews by Tedersoo *et al.* [34] and Tedersoo and  
215 Smith [35] and assigned OTUs to the genera and/or families that were predominantly  
216 ECM fungi. The resultant ECM fungal OTUs (ECM OTUs) were used for further  
217 analyses (see Table S1).

218

## 219 Data analyses

220 For all data analyses, the presence or absence of the ECM OTUs was used as  
221 the binary data, rather than the quantitative use of read numbers generated from  
222 amplicon sequencing [36, 37]. All analyses were performed using the R package,  
223 v.3.4.4 [38]. Differences in the sequencing depth of individual samples affect the  
224 number of OTUs retrieved, often leading to the underestimation of OTU richness in the  
225 samples that had low sequence reads. In our dataset, because the rarefaction curves for  
226 all samples reached an asymptote (Fig. S1), we did not conduct rarefaction analysis.

227 The OTU compositions were compared between plots. First, the presence or  
228 absence of ECM OTUs was recorded for each sample. Subsequently, these presence or  
229 absence data were merged within the plots, and the incidence data of each OTU for each



230 plot were generated (n = 10 for each plot). The max occurrence of each OTU was 10 for  
231 a single plot. To examine the ECM OTU composition, the dissimilarity index of OTU  
232 composition between plots was calculated using the Bray-Curtis index in which the  
233 incidence of OTUs is considered. In addition, we used the Raup-Crick index in which  
234 only the presence or absence of individual OTUs at each plot was used to confirm the  
235 robustness of the results, regardless of the other dissimilarity indexes used. The Raup-  
236 Crick dissimilarity index is a probabilistic index and is less affected by the species  
237 richness gradient among sampling units than the other major dissimilarity indexes,  
238 including the Bray-Curtis index [39]. The community dissimilarity of ECM OTUs  
239 among plots was ordinated in nonmetric multidimensional scaling (NMDS). The  
240 correlation of the NMDS structure with host identity and geographic (i.e., latitude and  
241 longitude) and environmental (i.e., elevation, soil pH, and soil C/N ratio) variables was  
242 tested by permutation tests ('envfit' command in the vegan package, 9999  
243 permutations). Subsequently, in order to investigate whether the dissimilarity of OTU  
244 composition is related to the host (species or family) and geographic positions of the  
245 plots (latitude and/or longitude), one-way permutational multivariate analysis of  
246 variance (PERMANOVA) was conducted.

247 We used variation partitioning based on the distance-based redundancy  
248 analysis (db-RDA, 'capscale' command in the vegan package) to quantify the  
249 contribution of the host, environmental, and spatial variables to the community structure  
250 of ECM fungal OTUs. The relative weight of each fraction (pure, shared, and  
251 unexplained fractions) was estimated following the methodology described by Peres-  
252 Neto *et al.* [40]. For the distance-based redundancy analysis (db-RDA), we constructed  
253 two models including environmental and spatial variables. The detailed methods for  
254 variation partitioning are described by Matsuoka *et al.* [8]. First, we constructed  
255 environmental models by applying the forward selection procedure (999 permutations  
256 with an alpha criterion = 0.05) of Blanchet *et al.* [41]Blanchet *et al.* (2008). The full  
257 models were as follows: [pH + C/N ratio + elevation + host identity]. Thereafter, we  
258 constructed the models using spatial variables, which were extracted based on Moran's  
259 Eigenvector Maps (MEM) [42], Borcard *et al.*, 2004. The MEM analysis produced a set  
260 of orthogonal variables derived from the geographical coordinates of the sampling  
261 locations. The MEM vectors were calculated using the 'dbmem' command in the

262 adespacial package. We used the MEM vectors that best accounted for autocorrelation  
263 and then conducted forward selection (999 permutations with an alpha criterion = 0.05;  
264 the full model contained six MEM variables). Based on these two models, we  
265 performed variation partitioning by calculating the adjusted  $R^2$  values for each fraction  
266 (Peres-Neto et al., 2006)[40].

267 To determine which OTU had significantly different frequencies among the  
268 host species, an indicator taxa analysis [43] was performed using the “signassoc”  
269 function in the “indicspecies” package on the presence or absence data for each sample  
270 ( $n = 180$ ). We used mode = 1 (group-based) and calculated the p-values with 999  
271 permutations after applying Sidak’s correction for multiple testing.

272

273

## 274 **Results**

### 275 Taxonomic assignment

276 In total, the filtered 204 627 pyrosequencing reads from the 180 samples were grouped  
277 into 488 OTUs with 97% sequence similarity (Table S1). Among them, 180 OTUs  
278 (53 939 reads) belonged to the ECM fungal taxa, with 169 OTUs belonging to  
279 Basidiomycota and 11 OTUs to Ascomycota. Each plot yielded 4 to 35 OTUs (18  
280 OTUs in average). At the family level, 169 OTUs belonged to 20 families, with the  
281 common families being Thelephoraceae (75 OTUs, 41.7% of the total number of ECM  
282 fungal OTUs) and Russulaceae (26 OTUs, 14.4%). These two families accounted for  
283 41.0 – 69.8 % of the total richness of ECM fungal OTUs in each tree species (Fig. S4).

284

### 285 Community structures of ECM OTUs

286 The NMDS ordination showed the separation of ECM OTU composition among plots  
287 (Fig. 2, stress value = 0.125). The ordination was significantly correlated with the host  
288 species and family (‘envfit’ function; host species,  $R^2 = 0.851$ ,  $P < 0.001$ ; host family,  
289  $R^2 = 0.559$ ,  $P < 0.001$ ), but not with the latitude, longitude, elevation, soil pH, and C/N  
290 ratio of the plot (latitude,  $R^2 = 0.029$ ,  $P = 0.795$ ; longitude,  $R^2 = 0.052$ ,  $P = 0.670$ ;  
291 elevation,  $R^2 = 0.1456$ ,  $P = 0.308$ ; soil pH,  $R^2 = 0.1099$ ,  $P = 0.4047$ ; soil C/N ratio,  $R^2 =$   
292  $0.0243$ ,  $P = 0.8334$ ). In the PERMANOVA, both host species and host family

293 significantly affected the ECM composition (host species, F-value = 57.7,  $R^2 = 0.960$ , P  
294 < 0.001; host family, F-value = 7.02,  $R^2 = 0.484$ , P < 0.001). In the variation  
295 partitioning, only host tree species identity was selected as an environmental variable,  
296 and two MEM vectors (MEM 4 and MEM 2) were selected as spatial variables (Fig. 3).  
297 The percentages explained by the environmental and spatial fractions were 28.7% and  
298 5.4%, respectively, and no shared fraction was detected between the environmental and  
299 spatial variables (Fig. 3). In total, 34.1% of the community variation was explained and  
300 the remaining 65.9% was unexplained. Using the Raup-Crick index did not affect the  
301 results. The NMDS ordination and results of variation partitioning with the Raup-Crick  
302 index are available in Supplementary materials (Figs. S2 and S3).

303         The indicator taxa analysis comparing the ECM communities among the host  
304 tree species detected significantly different host preferences of 38 OTUs ( $p < 0.05$  after  
305 Sidak's correction, Fig. 4). For each tree, three to nine ECM OTUs showed significantly  
306 higher frequencies of occurrence than the other tree species. Different ECM OTUs  
307 belonging to the same genus preferred different host tree species. (e.g., OTU\_085,  
308 OTU\_071, and OTU\_168 belonging to the genus *Russula* preferred *Quercus*, *Betula*,  
309 and *Picea* tree species as host trees, respectively). In addition, for OTU\_109 and  
310 OTU\_126 belonging to the same ECM fungal species, *Tomentella sublilacina*, the  
311 frequently detected host tree species were different, being *Betula* and *Alnus*,  
312 respectively.

313

314

## 315 ***Discussion***

316 In the present study, we clearly showed the relationships between host species and the  
317 ECM fungal community composition by investigating the monodominant forest stands  
318 of six ECM host species. We quantitatively evaluated the effect of abiotic  
319 environmental and spatial factors on ECM fungal communities in the field, thereby  
320 demonstrating the relative importance of host. In our study, the ECM fungal community  
321 composition was primarily divided by host species and/or family. In variation  
322 partitioning, any part of the fraction explained by host was not shared by the  
323 environmental or spatial factors, indicating that we successfully evaluated the pure

324 effect of host in the present study. From this variation partitioning, we could infer the  
325 relatively higher importance of host compared to other environmental and spatial factors.  
326 In addition, some OTUs showed preference to specific host tree species in our field and  
327 could partly contribute to the compositional similarity of ECM fungi within the same  
328 host species.

329 Our results clearly demonstrated that the ECM fungal composition were  
330 primarily clustered by host species and phylogeny rather than the soil environments and  
331 spatial arrangements of the plots. Similar ECM fungal community composition within  
332 the same host species and/or phylogeny has also been detected in other sites and host  
333 taxa [4, 8–10, 12]. These similarities in ECM fungal community compositions have  
334 been related to the preference of the fungi and/or host tree to partner species, although  
335 the exact mechanism of the preference has not been fully revealed. For example, Bogar  
336 *et al.* [13] conducted pot experiments with varying symbiotic ability among ECM  
337 fungal species, and suggested that plants can discriminate fungal partners and reward  
338 more carbohydrates to the fungal species beneficial for the host species. Such selection  
339 of the fungal partner by host plants might lead to the different ECM fungal  
340 compositions among host species in the field. In addition to these direct interactions  
341 between host tree and ECM fungus, environments that the host tree generates (e.g., soil  
342 properties) [44, 45] or the interaction with other organisms under particular host species  
343 such as soil bacteria or fungus might generate different ECM compositions among host  
344 tree species [46].

345 In our study, the host species has a primary effect on the ECM fungal  
346 community composition. However, as the present study is based on the field  
347 observation, we cannot infer a causal relationship between a host species and an ECM  
348 fungal community. Especially, there is a possibility that unmeasured factors are related  
349 to the ECM fungal community composition. For example, in the present study, because  
350 the broad-leaved stands are natural forests, the differences in fungi among these stands  
351 might partly include the possibility that the fungi and tree species are independently  
352 adapted to the same environments [47]. Furthermore, in variation partitioning, 65.9% of  
353 the community difference remained unexplained. This unexplained fraction might  
354 include the effects of the vegetation of the surrounding area, unexplained environmental

355 factors (e.g., soil organic phosphorus) [48], and drift (i.e., random arrival and  
356 extinction) [49].

357 In our site, the detection of some OTUs was biased to specific host species (Fig.  
358 4). These OTUs might have a high host preference (Fig. 4). Different OTUs belonging  
359 to same genus preferred different host tree species. (e.g., OTU\_085, OUT\_071, and  
360 OUT\_168 belonging to the genus *Russula* preferred *Quercus*, *Betula*, and *Picea* tree  
361 species as host trees. Moreover, although OTU\_109 and OTU\_126 were identified as  
362 the same species, *Tomentella sublilacina*, the host species frequently associated with  
363 these two OTUs were different (*Betula* and *Alnus*, respectively). *Tomentella sublilacina*  
364 has been detected from various regions and hosts tree species in the Northern  
365 Hemisphere [11, 47], and its preferred host tree species might be different among  
366 genotypes and/or habitats. Our results indicate that the degree of preference and the  
367 preferred host is different at the fungal species or genotype level, rather than at the  
368 genus or family level in our study forests.

369 Besides host species, the effect of spatial distance on the ECM fungal  
370 community composition was detected. This indicates that the ECM fungal compositions  
371 become similar at spatially close sites, regardless of the host trees. For example, in the  
372 present study, the ECM fungal communities were similar between the *Betula* and *Larix*  
373 forests and between the *Abies* and *Larix* forests (Fig. 2). These high similarities of ECM  
374 compositions can be partly due to the geographical closeness of the *Betula* 2 and *Larix* 2  
375 plots and between the *Abies* 2 and *Larix* 3 plots (c.a. 100 m, Table 1 and Fig. 1). As  
376 factors that lead to such spatial structures at a small spatial scale (c.a. < 100 m),  
377 dispersal and colonization limitations can be suggested. Though the dispersal distances  
378 of fungal spores are not fully understood, a previous study revealed that most spores fall  
379 within several meters from sporocarps [16]. Thus, spatially closer plots potentially share  
380 more inoculums. Moreover, in spatially closer plots, the same ECM fungal individuals  
381 can be shared between different host species via belowground mycelia. Such sharing of  
382 inoculum and/or mycelia might result in the sharing of ECM species between different  
383 adjacent tree species [17, 18]. In our study site, for example, OTU\_109 was detected  
384 both from *Betula* 2 and *Larix* 2. This OTU prefers *Betula* (Fig. 4); therefore, the  
385 detection of this OTU from the *Larix* plot might be due to the infections induced by  
386 mycelia. As few studies have investigated the distance limitation in such infections via

387 mycelia, elucidating the importance and frequency of these infections to an unpreferred  
388 host needs further investigation. Nevertheless, in our results, the ECM fungal  
389 communities were shown to be similar between neighboring plots existing within a  
390 distance of 100 m, although the host tree species were different. Such spatial structure  
391 can hinder the investigation of fungal-plant combinations caused by partner preferences.

392 In summary, in the present study, we clearly demonstrated that the ECM fungal  
393 communities were primarily structured by the species and families of hosts in a forest  
394 landscape. Our results further suggest that the preference of fungi and/or host to partner  
395 species can primarily structure ECM fungal compositions in the field. In addition, in our  
396 study site, the neighboring plots harbored similar fungal communities, though the host  
397 species were different, and the effect of the spatial distance on the similarity was also  
398 suggested. Therefore, in order to clarify the preferred host species of individual ECM  
399 fungi in fields, further studies considering the spatial configuration of the host tree  
400 individual and spatial factors are necessary. The mechanisms by which host preference  
401 occurs and further observations of relationships between ECM fungal composition and  
402 host identities in other host species and environments would be the future research  
403 topics.

404

#### 405 ***Data Accessibility***

406 All data of the 454 sequencing was shared in DRA (Accession number: DRA007781)

407

#### 408 ***Acknowledgments***

409 We thank the staffs of Hokkaido Forest Research Station, Field Science Education and  
410 Research Center, Kyoto University and Celina Sakaguchi for assistance in fieldwork;  
411 Miyuki Hirata for assistance in laboratory work; Koichi Ito for useful discussions; and  
412 Hirotoshi Sato and Hideyuki Doi for critical comments on the manuscripts.

413

#### 414 ***Funding***

415 This study received partial financial support from Japan Society for the Promotion of  
416 Science (JSPS) to SM (17K15199) and TO (18K05731).

417

418 ***Competing interests***

419 We have no competing interests.

420

421 ***Author contributions***

422 SM, TO, and RT designed the study and SM, SI, TO, and RT contributed to field survey  
423 and sampling. SM, YS, and EK contributed to molecular experiments. SM and YS  
424 analyzed the data and interpreted the results. SM, YS, RT, and TO wrote the initial draft  
425 of the manuscript. All other authors critically reviewed the manuscript.

426

427 ***References***

- 428 1. Brundrett MC. 2009. Mycorrhizal associations and other means of nutrition  
429 of vascular plants: understanding the global diversity of host plants by  
430 resolving conflicting information and developing reliable means of diagnosis.  
431 *Plant Soil*. **320**, 37–77. doi:10.1007/s11104-008-9877-9
- 432 2. Smith S, Read D. 2008. *Mycorrhizal Symbiosis*. New York: Academic Press.
- 433 3. Lilleskov EA, Parrent JL. 2007. Can we develop general predictive models of  
434 mycorrhizal fungal community-environment relationships? *New Phytol*. **174**,  
435 250–256. doi:10.1111/j.1469-8137.2007.02023.x
- 436 4. Ishida TA, Nara K, Hogetsu T. 2007. Host effects on ectomycorrhizal fungal  
437 communities: insight from eight host species in mixed conifer-broadleaf  
438 forests. *New Phytol*. **174**, 430–440. doi:10.1111/j.1469-8137.2007.02016.x
- 439 5. Toljander JF, Eberhardt U, Toljander YK, Paul LR, Taylor AFS. 2006.  
440 Species composition of an ectomycorrhizal fungal community along a local  
441 nutrient gradient in a boreal forest. *New Phytol*. **170**, 873–884.  
442 doi:10.1111/j.1469-8137.2006.01718.x
- 443 6. Peay KG, Schubert MG, Nguyen NH, Bruns TD. 2012. Measuring  
444 ectomycorrhizal fungal dispersal: macroecological patterns driven by  
445 microscopic propagules. *Mol Ecol*. **21**, 4122–4136. doi:10.1111/j.1365-

- 446           294X.2012.05666.x
- 447           7. Peay KG, Bruns TD. 2014. Spore dispersal of basidiomycete fungi at the  
448           landscape scale is driven by stochastic and deterministic processes and  
449           generates variability in plant-fungal interactions. *New Phytol.* **204**: 180–191.  
450           doi:10.1111/nph.12906
- 451           8. Matsuoka S, Mori AS, Kawaguchi E, Hobara S, Osono T. 2016.  
452           Disentangling the relative importance of host tree community, abiotic  
453           environment and spatial factors on ectomycorrhizal fungal assemblages along  
454           an elevation gradient. *FEMS Microbiol Ecol.* **92**, fiw044.  
455           doi:10.1093/femsec/fiw044
- 456           9. Boeraeve M, Honnay O, Jacquemyn H. 2018. Effects of host species,  
457           environmental filtering and forest age on community assembly of  
458           ectomycorrhizal fungi in fragmented forests. *Fungal Ecol.* **36**, 89–98.  
459           doi:10.1016/j.funeco.2018.08.003
- 460           10. Wang Z, Jiang Y, Deane DC, He F, Shu W, Liu Y. 2019. Effects of host  
461           phylogeny, habitat and spatial proximity on host specificity and diversity of  
462           pathogenic and mycorrhizal fungi in a subtropical forest. *New Phytol.* **223**,  
463           462–474. doi: 10.1111/nph.15786
- 464           11. Horton TR, Bruns TD. 1998. Multiple-host fungi are the most frequent and  
465           abundant ectomycorrhizal types in a mixed stand of Douglas fir (*Pseudotsuga*  
466           *menziesii*) and bishop pine (*Pinus muricata*). *New Phytol.* **139**, 331–339.  
467           doi:10.1046/j.1469-8137.1998.00185.x
- 468           12. Tedersoo L, Mett M, Ishida TA, Bahram M. 2013. Phylogenetic relationships  
469           among host plants explain differences in fungal species richness and  
470           community composition in ectomycorrhizal symbiosis. *New Phytol.* **199**,  
471           822–831. doi:10.1111/nph.12328
- 472           13. Bogar L, Peay K, Kornfeld A, Huggins J, Hortal S, Anderson I, et al. 2019.  
473           Plant-mediated partner discrimination in ectomycorrhizal mutualisms.



- 474 Mycorrhiza. **29**, 97–111. doi:10.1007/s00572-018-00879-7
- 475 14. Molina RM, Horton TR. 2015. Mycorrhizal specificity: Its role in the  
476 development and function of common mycelial networks. In: Horton TR.,  
477 editor. Mycorrhizal Networks. Dordrecht: Springer. pp. 1–39.
- 478 15. Punchi-Manage R, Wiegand T, Wiegand K, Getzin S, Gunatilleke CVS,  
479 Gunatilleke IAUN. 2014. Effect of spatial processes and topography on  
480 structuring species assemblages in a Sri Lankan dipterocarp forest. Ecology.  
481 **95**, 376–386. doi:10.1890/12-2102.1
- 482 16. Galante TE, Horton TR, Swaney DP. 2011. 95% of basidiospores fall within 1  
483 m of the cap: a field-and modeling-based study. Mycologia. **103**, 1175–1183.  
484 doi:10.3852/10-388
- 485 17. Bogar LM, Kennedy PG. 2013. New wrinkles in an old paradigm:  
486 neighborhood effects can modify the structure and specificity of *Alnus*-  
487 associated ectomycorrhizal fungal communities. FEMS Microbiol. Ecol. **83**,  
488 767–777. doi:10.1111/1574-6941.12032
- 489 18. Hubert NA, Gehring CA. 2008. Neighboring trees affect ectomycorrhizal  
490 fungal community composition in a woodland-forest ecotone. Mycorrhiza.  
491 **18**, 363–374. doi:10.1007/s00572-008-0185-2
- 492 19. Lilleskov EA, Bruns TD, Horton TR, Taylor D, Grogan P. 2004. Detection of  
493 forest stand-level spatial structure in ectomycorrhizal fungal communities.  
494 FEMS Microbiol. Ecol. **49**, 319–332. doi:10.1016/j.femsec.2004.04.004
- 495 20. Bahram M, Peay KG, Tedersoo L. 2015. Local-scale biogeography and  
496 spatiotemporal variability in communities of mycorrhizal fungi. New Phytol.  
497 **205**, 1454–1463. doi:10.1111/nph.13206
- 498 21. Gardes M, Bruns TD. 1993. ITS primers with enhanced specificity for  
499 basidiomycetes - application to the identification of mycorrhizae and rusts.  
500 Mol Ecol. **2**, 113–118. doi:10.1111/j.1365-294X.1993.tb00005.x

- 501 22. Schoch CL, Seifert KA, Huhndorf S, Robert V, Spouge JL, Levesque CA, et  
502 al. 2012. Nuclear ribosomal internal transcribed spacer (ITS) region as a  
503 universal DNA barcode marker for Fungi. *Proc Natl Acad Sci U S A*. **109**,  
504 6241–6246. doi:10.1073/pnas.1117018109
- 505 23. Vilgalys R, Hester M. 1990. Rapid genetic identification and mapping of  
506 enzymatically amplified ribosomal DNA from several *Cryptococcus* species.  
507 *J Bacteriol*. **172**, 4238–4246. doi:10.1128/jb.172.8.4238-4246.1990
- 508 24. Hamady M, Walker JJ, Harris JK, Gold NJ, Knight R. 2008. Error-correcting  
509 barcoded primers for pyrosequencing hundreds of samples in multiplex. *Nat*  
510 *Methods*. **5**, 235–237. doi:10.1038/nmeth.1184
- 511 25. White TJ, Bruns TD, Lee SB, Taylor JW. 1990. Amplification and direct  
512 sequencing of fungal ribosomal RNA genes for phylogenetics. In: Innis MA,  
513 Gelfand DH, Sninsky JJ, T.J White, editors. *PCR Protocols – a Guide to*  
514 *Methods and Applications*. San Diego: CA Academic Press. pp. 315–322.
- 515 26. Kunin V, Engelbrektson A, Ochman H, Hugenholtz P. 2010. Wrinkles in the  
516 rare biosphere: pyrosequencing errors can lead to artificial inflation of  
517 diversity estimates. *Environ Microbiol*. **12**, 118–123. doi:10.1111/j.1462-  
518 2920.2009.02051.x
- 519 27. Tanabe AS. 2018. Claident. A software distributed by the author. [cited 2019  
520 October]. Available from: <https://www.claident.org/>
- 521 28. Edgar RC, Haas BJ, Clemente JC, Quince C, Knight R. 2011. UCHIME  
522 improves sensitivity and speed of chimera detection. *Bioinformatics*. **27**,  
523 2194–2200. doi:10.1093/bioinformatics/btr381
- 524 29. Li W, Fu L, Niu B, Wu S, Wooley J. 2012. Ultrafast clustering algorithms for  
525 metagenomic sequence analysis. *Brief Bioinform*. **13**, 656–668.  
526 doi:10.1093/bib/bbs035
- 527 30. Osono T. 2014. Metagenomic approach yields insights into fungal diversity

- 528 and functioning. In: Sota T, Kagata H, Ando Y et al. (eds). *Species Diversity*  
529 *and Community Structure*. 1–23. Berlin, Germany: Springer.
- 530 31. Tanabe AS, Toju H. 2013. Two new computational methods for universal  
531 DNA barcoding: A benchmark using barcode sequences of bacteria, archaea,  
532 animals, fungi, and land plants. *PLoS ONE*. **8**, e76910.  
533 doi:10.1371/journal.pone.0076910
- 534 32. Camacho C, Coulouris G, Avagyan V, Ma N, Papadopoulos J, Bealer K, et al.  
535 2009. BLAST+: architecture and applications. *BMC Bioinform*. **10**, 421.  
536 doi:10.1186/1471-2105-10-421
- 537 33. Huson DH, Auch AF, Qi J, Schuster SC. 2007. MEGAN analysis of  
538 metagenomic data. *Genome Res*. **17**, 377–386. doi:10.1101/gr.5969107
- 539 34. Tedersoo L, May TW, Smith ME. 2010. Ectomycorrhizal lifestyle in fungi:  
540 global diversity, distribution, and evolution of phylogenetic lineages.  
541 *Mycorrhiza*. **20**, 217–263. doi:10.1007/s00572-009-0274-x
- 542 35. Tedersoo L, Smith ME. 2013. Lineages of ectomycorrhizal fungi revisited:  
543 Foraging strategies and novel lineages revealed by sequences from  
544 belowground. *Fungal Biol Rev*. **27**, 83–99. doi:10.1016/j.fbr.2013.09.001
- 545 36. Amend AS, Seifert KA, Bruns TD. 2010. Quantifying microbial communities  
546 with 454 pyrosequencing: does read abundance count? *Mol Ecol*. **19**, 5555–  
547 5565. doi: 10.1111/j.1365-294X.2010.04898.x
- 548
- 549 37. Elbrecht V, Leese F. 2015. Can DNA-based ecosystem assessments quantify  
550 species abundance? Testing primer bias and biomass—sequence relationships  
551 with an innovative metabarcoding protocol. *PLoS ONE*. **10**, e0130324.  
552 doi:10.1371/journal.pone.0130324
- 553 38. R Core Team. 2018. R: A language and environment for statistical computing.  
554 R Foundation for Statistical Computing, Vienna, Austria. [http://www.R-](http://www.R-project.org)  
555 [project.org](http://www.R-project.org)

- 556 39. Chase JM. 2010. Stochastic community assembly causes higher biodiversity  
557 in more productive environments. *Science*. **328**, 1388–1391. doi:  
558 10.1126/science.1187820
- 559 40. Peres-Neto PR, Legendre P, Dray S, Borcard D. 2006. Variation partitioning  
560 of species data matrices: estimation and comparison of fractions. *Ecology*. **87**,  
561 2614–2625. doi: 10.1890/0012-9658(2006)87[2614:VPOSDM]2.0.CO;2
- 562 41. Blanchet FG, Legendre P, Borcard D. 2008. Forward Selection of explanatory  
563 variables. *Ecology*. **89**, 2623–2632. doi: 10.1890/07-0986.1
- 564 42. Borcard D, Legendre P, Avois-Jacquet C, Tuomisto H. 2004. Dissecting the  
565 spatial structure of ecological data at multiple scales. *Ecology*. **85**, 1826–  
566 1832. doi:10.1890/03-3111
- 567 43. De Cáceres M, Legendre P. 2009. Associations between species and groups  
568 of sites: indices and statistical inference. *Ecology*. **90**, 3566–3574.  
569 doi:10.1890/08-1823.1
- 570 44. Huggins JA, Talbot J, Gardes M, Kennedy PG. 2014. Unlocking  
571 environmental keys to host specificity: differential tolerance of acidity and  
572 nitrate by *Alnus*-associated ectomycorrhizal fungi. *Fungal Ecol*. **12**, 52–61.  
573 doi:10.1016/j.funeco.2014.04.003
- 574 45. Ushio M, Aiba S, Takeuchi Y, Iida Y, Matsuoka S, Repin R, et al. 2017. Plant-  
575 soil feedbacks and the dominance of conifers in a tropical montane forest in  
576 Borneo. *Ecol Monogr*. **87**, 105–129. doi:10.1002/ecm.1236
- 577 46. Nakayama M, Imamura S, Taniguchi T, Tateno R. 2019. Does conversion  
578 from natural forest to plantation affect fungal and bacterial biodiversity,  
579 community structure, and co-occurrence networks in the organic horizon and  
580 mineral soil? *Forest Ecol Manag*. **446**, 238–250.  
581 doi:10.1016/j.foreco.2019.05.042
- 582 47. Miyamoto Y, Sakai A, Hattori M, Nara K. 2015. Strong effect of climate on

- 583 ectomycorrhizal fungal composition: evidence from range overlap between  
584 two mountains. *ISME J.* **9**, 1870–1879. doi:10.1038/ismej.2015.8
- 585 48. Kluber LA, Carrino-Kyker SR, Coyle KP, DeForest JL, Hewins CR, Shaw  
586 AN, et al. 2012. Mycorrhizal response to experimental pH and P  
587 manipulation in acidic hardwood forests. *PLoS ONE.* **7**, e48946.  
588 doi:10.1371/journal.pone.0048946
- 589 49. Hubbell SP. 2001. *The unified neutral theory of biodiversity and*  
590 *biogeography.* New York: Princeton University Press.

591 Table 1 Host tree species and their stand conditions

| Plot             | Host tree species         | Host Family | Soil pH | Soil C/N ratio | Elevation (m) | Latitude (°N) | Longitude (°E) | Dominance of the host species <sup>1</sup> (%) | Other ECM tree species <sup>2</sup>                          |
|------------------|---------------------------|-------------|---------|----------------|---------------|---------------|----------------|------------------------------------------------|--------------------------------------------------------------|
| <i>Quercus</i> 1 | <i>Quercus crispula</i>   | Fagaceae    | 5.40    | 13.6           | 118.49        | 43.3462       | 144.6526       | 58.0                                           | <i>Salix caprea</i> (3.3)<br><i>Betula platyphylla</i> (1.9) |
| <i>Quercus</i> 2 | <i>Quercus crispula</i>   | Fagaceae    | 5.22    | 13.3           | 121.13        | 43.3897       | 144.6552       | 44.5                                           | -                                                            |
| <i>Quercus</i> 3 | <i>Quercus crispula</i>   | Fagaceae    | 4.75    | 16.3           | 139.50        | 43.4026       | 144.6433       | 86.0                                           | -                                                            |
| <i>Betula</i> 1  | <i>Betula platyphylla</i> | Betulaceae  | 5.32    | 12.5           | 44.92         | 43.3364       | 144.6255       | 57.0                                           | <i>Alnus hirsute</i> (18.7)                                  |
| <i>Betula</i> 2  | <i>Betula platyphylla</i> | Betulaceae  | 4.98    | 12.3           | 55.96         | 43.3573       | 144.6414       | 67.7                                           | <i>Alnus hirsute</i> (16.6)                                  |
| <i>Betula</i> 3  | <i>Betula platyphylla</i> | Betulaceae  | 5.47    | 12.8           | 72.91         | 43.3818       | 144.6454       | 97.7                                           | -                                                            |
| <i>Alnus</i> 1   | <i>Alnus hirsuta</i>      | Betulaceae  | 5.25    | 14.1           | 46.83         | 43.3375       | 144.6300       | 100                                            | -                                                            |
| <i>Alnus</i> 2   | <i>Alnus hirsuta</i>      | Betulaceae  | 5.38    | 13.2           | 65.79         | 43.3764       | 144.6462       | 100                                            | -                                                            |
| <i>Alnus</i> 3   | <i>Alnus hirsuta</i>      | Betulaceae  | 5.40    | 13.2           | 105.54        | 43.3984       | 144.6442       | 100                                            | -                                                            |
| <i>Abies</i> 1   | <i>Abies sachalinensi</i> | Pinaceae    | 5.48    | 11.8           | 51.38         | 43.3389       | 144.6325       | 89.0                                           | -                                                            |
| <i>Abies</i> 2   | <i>Abies sachalinensi</i> | Pinaceae    | 5.34    | 13.1           | 139.79        | 43.3698       | 144.6627       | 100                                            | -                                                            |
| <i>Abies</i> 3   | <i>Abies sachalinensi</i> | Pinaceae    | 5.14    | 16.0           | 153.39        | 43.4061       | 144.6428       | 89.3                                           | <i>Quercus dentate</i> (3.7)                                 |
| <i>Picea</i> 1   | <i>Picea glehnii</i>      | Pinaceae    | 5.28    | 15.3           | 51.65         | 43.3412       | 144.6325       | 96.0                                           | -                                                            |
| <i>Picea</i> 2   | <i>Picea glehnii</i>      | Pinaceae    | 5.05    | 13.8           | 116.71        | 43.3670       | 144.6508       | 98.7                                           | -                                                            |
| <i>Picea</i> 3   | <i>Picea glehnii</i>      | Pinaceae    | 5.17    | 13.2           | 133.28        | 43.3682       | 144.6514       | 98.9                                           | -                                                            |
| <i>Larix</i> 1   | <i>Larix kaempferi</i>    | Pinaceae    | 5.16    | 13.3           | 80.43         | 43.3426       | 144.6358       | 92.1                                           | <i>Betula platyphylla</i> (2.0)<br><i>Salix caprea</i> (0.8) |
| <i>Larix</i> 2   | <i>Larix kaempferi</i>    | Pinaceae    | 4.92    | 13.0           | 55.23         | 43.3570       | 144.6403       | 93.3                                           | -                                                            |
| <i>Larix</i> 3   | <i>Larix kaempferi</i>    | Pinaceae    | 4.54    | 13.5           | 134.69        | 43.3682       | 144.6625       | 99.1                                           | <i>Betula platyphylla</i> (0.9)                              |

592 1 calculated based on basal area (m<sup>2</sup> per ha)

593 2 dominance of each species based on basal area (m<sup>2</sup> per ha) are in parentheses

594

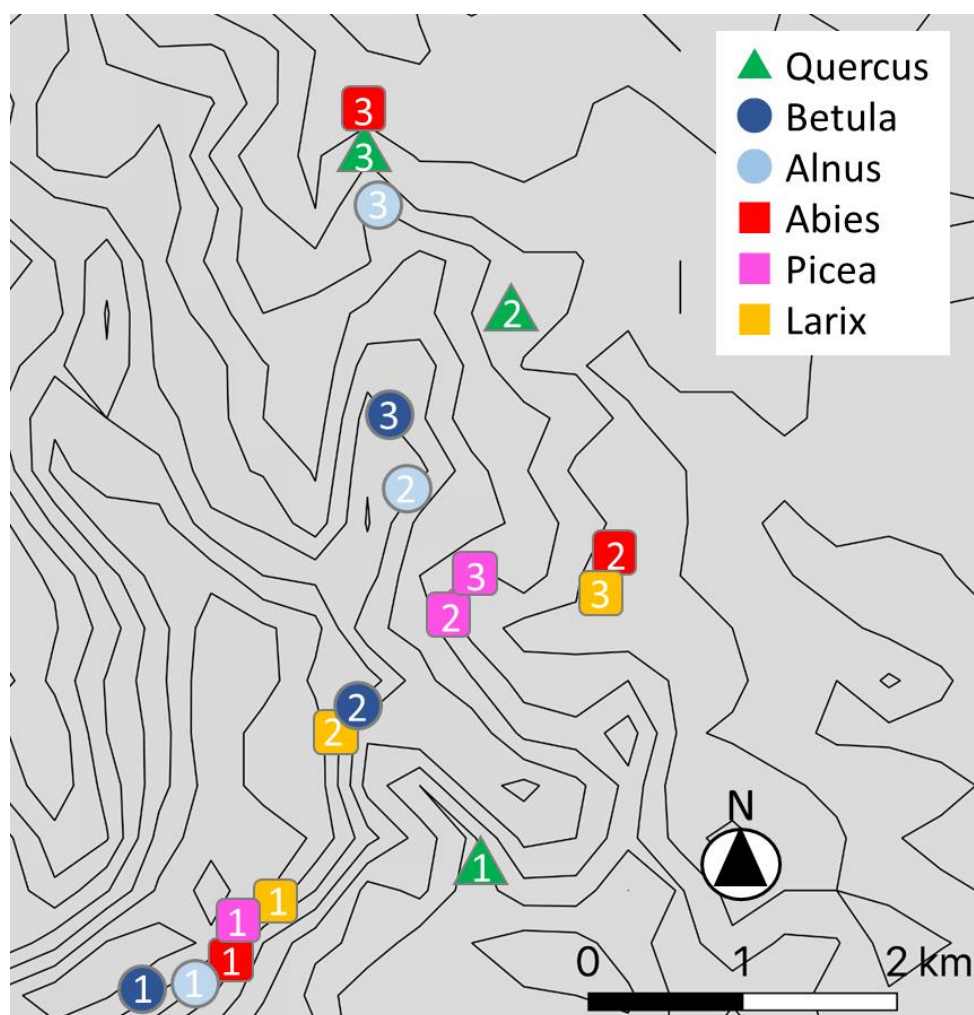

595

596

597 Fig. 1 Sampling plots of each tree species. Plot numbers in the symbols are consistent  
598 with those listed in Table 1 and Fig. 2.

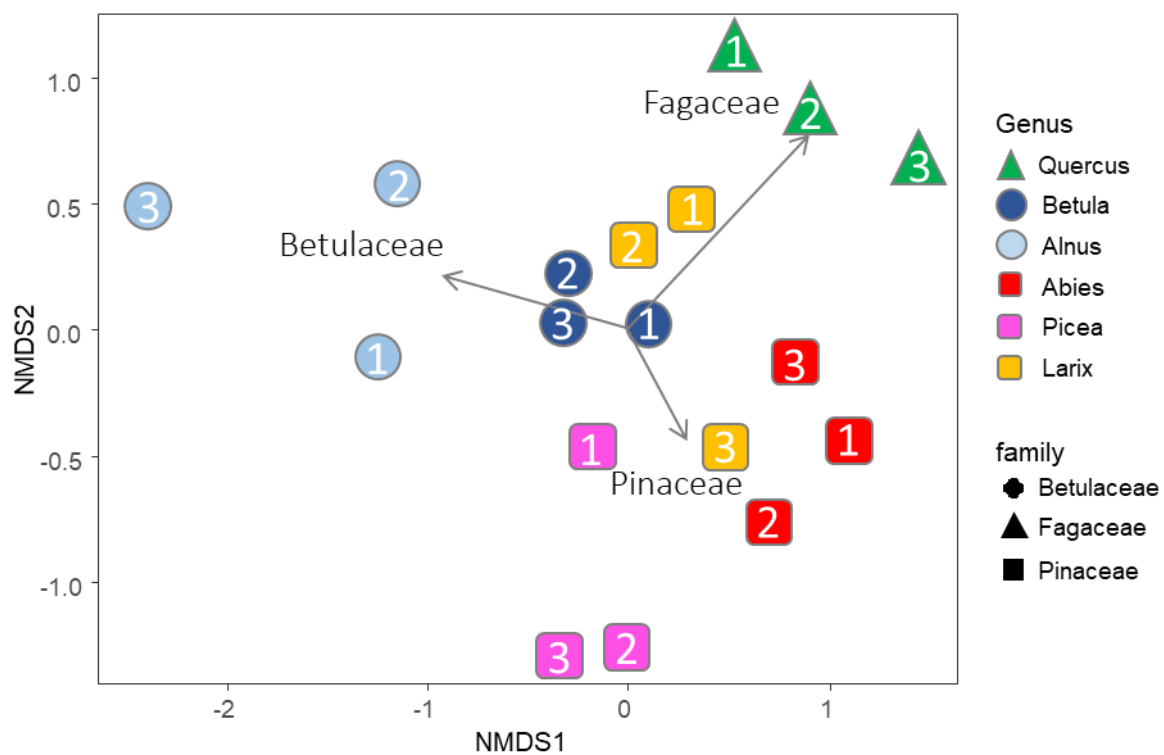

599  
600  
601  
602  
603  
604  
605

Fig. 2 Community dissimilarity among the plots as revealed by nonmetric multidimensional scaling (NMDS) ordination using the Bray-Curtis index (stress value = 0.125). Plot numbers in the symbols are consistent with those listed in Table 1 and Fig. 1.



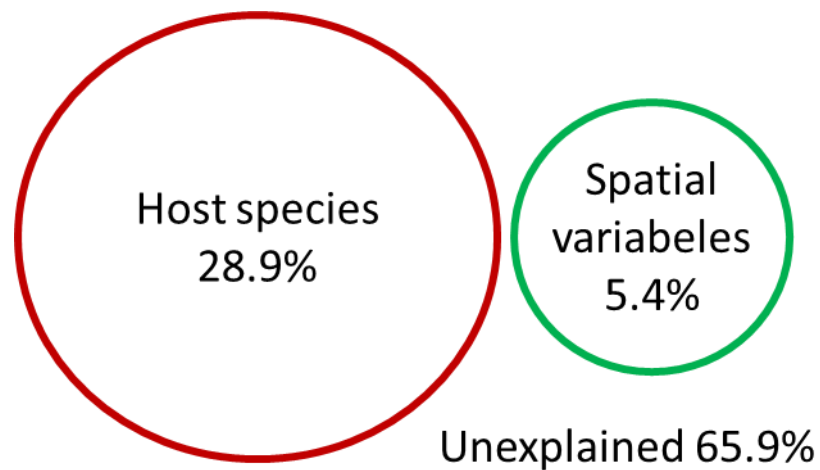

606  
607  
608  
609  
610  
611  
612

Fig. 3 Venn diagram showing the effects of host species and spatial distance on the ectomycorrhizal (ECM) fungal community composition as derived from the variation partitioning analysis. Numbers indicate the proportions of explained variation. No shared fraction between the host species and spatial variables was detected.

| OTU ID  | taxonomy                         | Qm | Bp | Ah | As | Pg | Lk |
|---------|----------------------------------|----|----|----|----|----|----|
| OTU_006 | <i>Russula heterophylla</i>      | ■  |    |    |    |    |    |
| OTU_085 | <i>Russula</i> sp.               |    |    |    |    |    |    |
| OTU_461 | <i>Lactarius</i> sp.             |    |    |    |    |    |    |
| OTU_003 | <i>Tomentella</i> sp.            |    | ■  |    |    |    |    |
| OTU_012 | Thelephoraceae sp.               |    |    |    |    |    |    |
| OTU_071 | <i>Russula</i> sp.               |    |    |    |    |    |    |
| OTU_109 | <i>Tomentella sublilacina</i>    |    |    |    |    |    |    |
| OTU_240 | <i>Inocybe</i> sp.               |    |    |    |    |    |    |
| OTU_463 | <i>Lactarius tabidus</i>         |    |    |    |    |    |    |
| OTU_070 | Thelephoraceae sp.               |    |    |    |    |    |    |
| OTU_126 | <i>Tomentella sublilacina</i>    |    |    |    |    |    |    |
| OTU_138 | <i>Lactarius</i> sp.             |    |    |    |    |    |    |
| OTU_173 | <i>Lactarius</i> sp.             |    |    |    |    |    |    |
| OTU_176 | Thelephoraceae sp.               |    |    |    |    |    |    |
| OTU_199 | <i>Cortinarius</i> sp.           |    |    |    |    |    |    |
| OTU_202 | <i>Alnicola</i> sp.              |    |    |    |    |    |    |
| OTU_230 | <i>Inocybe</i> sp.               |    |    |    |    |    |    |
| OTU_270 | <i>Inocybe</i> sp.               |    |    |    |    |    |    |
| OTU_359 | Thelephoraceae sp.               |    |    |    |    |    |    |
| OTU_404 | <i>Sebacina dimitica</i>         |    |    |    |    |    |    |
| OTU_410 | <i>Inocybe</i> sp.               |    |    |    |    |    |    |
| OTU_412 | <i>Inocybe</i> sp.               |    |    |    |    |    |    |
| OTU_414 | Thelephoraceae sp.               |    |    |    |    |    |    |
| OTU_473 | <i>Sebacina</i> sp.              |    |    |    |    |    |    |
| OTU_166 | <i>Amphinema</i> sp.             |    |    |    |    |    |    |
| OTU_168 | <i>Russula</i> sp.               |    |    |    |    |    |    |
| OTU_214 | <i>Russula</i> sp.               |    |    |    |    |    |    |
| OTU_077 | <i>Amphinema</i> sp.             |    |    |    |    |    |    |
| OTU_178 | <i>Tylospora asterophora</i>     |    |    |    |    |    |    |
| OTU_131 | <i>Pseudotomentella mucidula</i> |    |    |    |    |    |    |
| OTU_156 | <i>Tomentella</i> sp.            |    |    |    |    |    |    |
| OTU_204 | <i>Tomentella</i> sp.            |    |    |    |    |    |    |
| OTU_224 | <i>Tomentella</i> sp.            |    |    |    |    |    |    |
| OTU_276 | <i>Hygrophorus</i> sp.           |    |    |    |    |    |    |
| OTU_292 | <i>Meliniomyces</i> sp.          |    |    |    |    |    |    |
| OTU_356 | <i>Tomentella</i> sp.            |    |    |    |    |    |    |
| OTU_381 | Thelephoraceae sp.               |    |    |    |    |    |    |
| OTU_440 | <i>Tomentella stuposa</i>        |    |    |    |    |    |    |

613

614

615 Fig. 4 Operational taxonomic units (OTUs) with significantly high detection frequency  
616 in particular host tree species. Filled boxes show the combination of ectomycorrhizal  
617 (ECM) OTU and tree species with significantly high detection frequency. ( $P < 0.05$   
618 after Sidak's correction). OTU ID and taxonomy are in accordance with Table S1.
